# Supplementary material for: Aromatic fluorine atom-induced highly amine-sensitive trimethine cyanine dye showing colorimetric and ratiometric fluorescence change
Source: Royal Society of Chemistry journal article supplement (doi:10.1039/d2ra04387d), 2022-01-01
Supplement: d2ra04387d2.pdf [file d2ra04387d2.pdf]

## Electronic Supplementary Information

### **Aromatic fluorine atom-induced highly amine-sensitive trimethine cyanine dye showing colorimetric and ratiometric fluorescence change**

Ryunosuke Kani,<sup>a</sup> Yasuhiro Kubota,<sup>a</sup> Toshiyasu Inuzuka,<sup>b</sup> and Kazumasa Funabiki<sup>a,\*</sup>

*<sup>a</sup>Department of Chemistry and Biomolecular Science, Gifu University, 1-1 Yanagido, Gifu 501-1193, Japan.*

*<sup>b</sup>Division of Instrumental Analysis, Life Science Research Centre, Gifu University, 1-1 Yanagido, Gifu 501-1193, Japan.*

\*Corresponding author: Kazumasa Funabiki

Telephone: 058-293-2599

Fax: +81-58-293-2794

E-mail address: funabiki@gifu-u.ac.jp

#### **Contents**

|                                      |           |
|--------------------------------------|-----------|
| Fig. S1 and Table S1                 | p. S2     |
| Fig. S2                              | p. S3     |
| Fig. S3                              | p. S4     |
| Fig. S4                              | p. S5     |
| The results of fluorescence lifetime | p. S6-S7  |
| Computational calculation data       | p. S8-S12 |
| References                           | p. S13    |

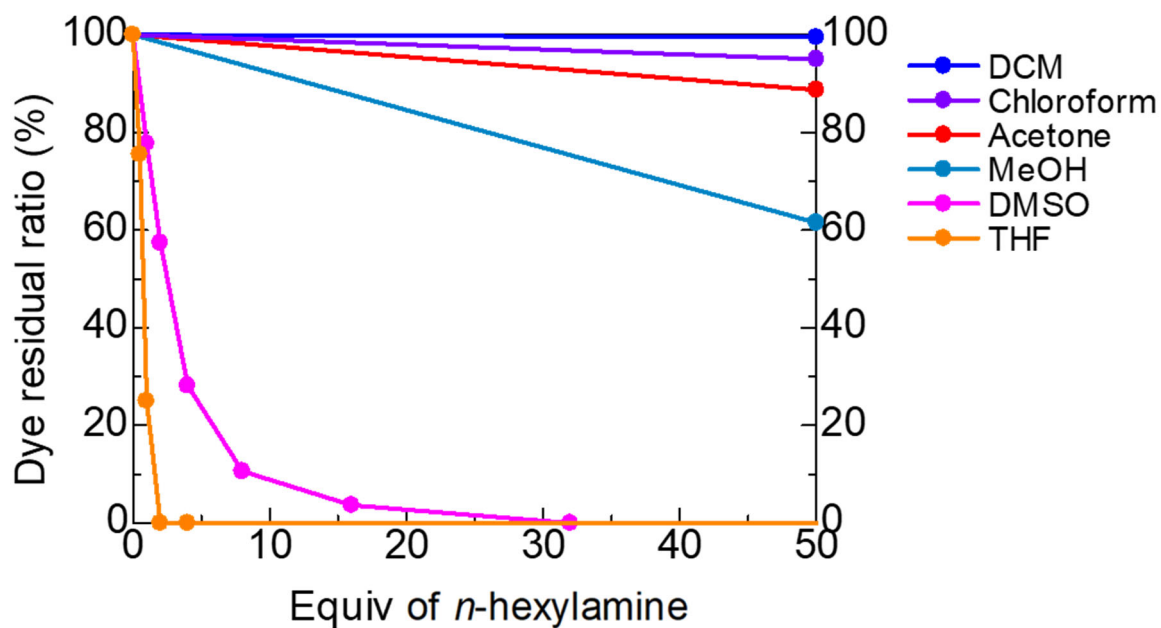

**Figure S1.** Dye residual ratio calculated from molar absorption coefficient ( $\epsilon$ ) at 579 nm of dye **2a** solution ( $5 \times 10^{-6}$  M) in adding *n*-hexylamine.

**Table S1.** DN and AN value of solvents.

| Solvent    | AN | DN (kcal mol <sup>-1</sup> ) |
|------------|----|------------------------------|
| DCM        | 20 | 1                            |
| Chloroform | 23 | 4                            |
| Acetone    | 13 | 17                           |
| MeOH       | 42 | 19                           |
| DMSO       | 19 | 30                           |
| THF        | 8  | 20                           |

<sup>a</sup> Gutmann Acceptor number (AN) and Donor number (DN).

a)

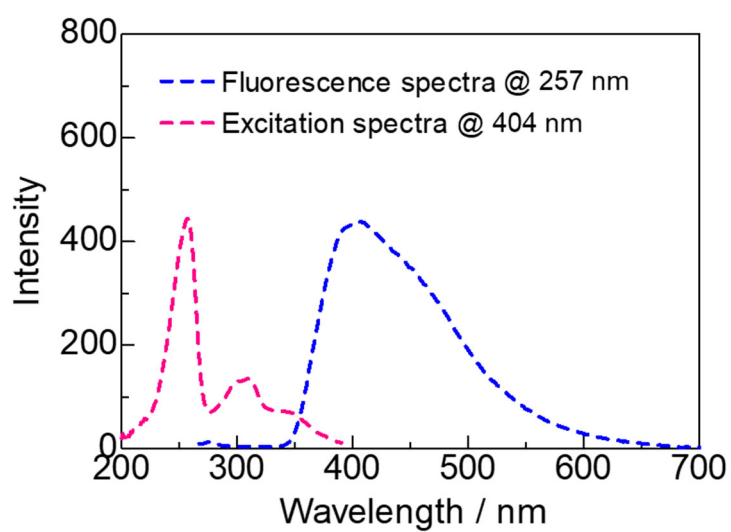

b)

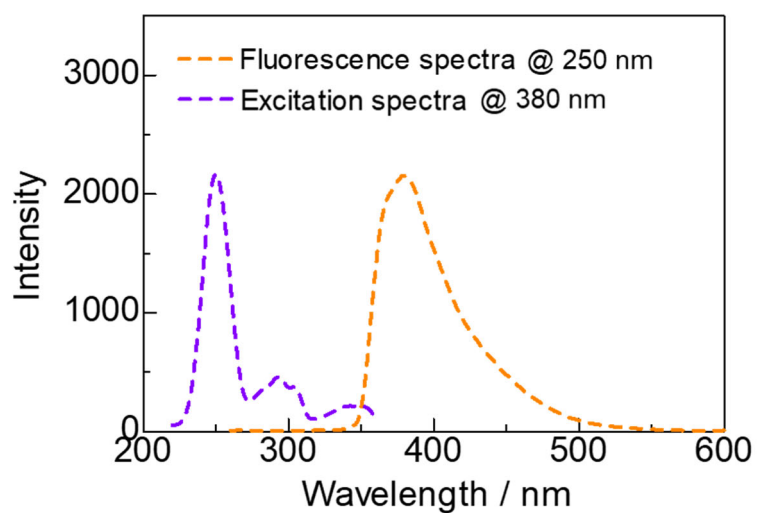

**Fig. S2.** a) Fluorescence and excitation spectra of dye **2a** and b) **2b** ( $5 \times 10^{-6}$  M) in THF completely reacted with *n*-hexylamine.

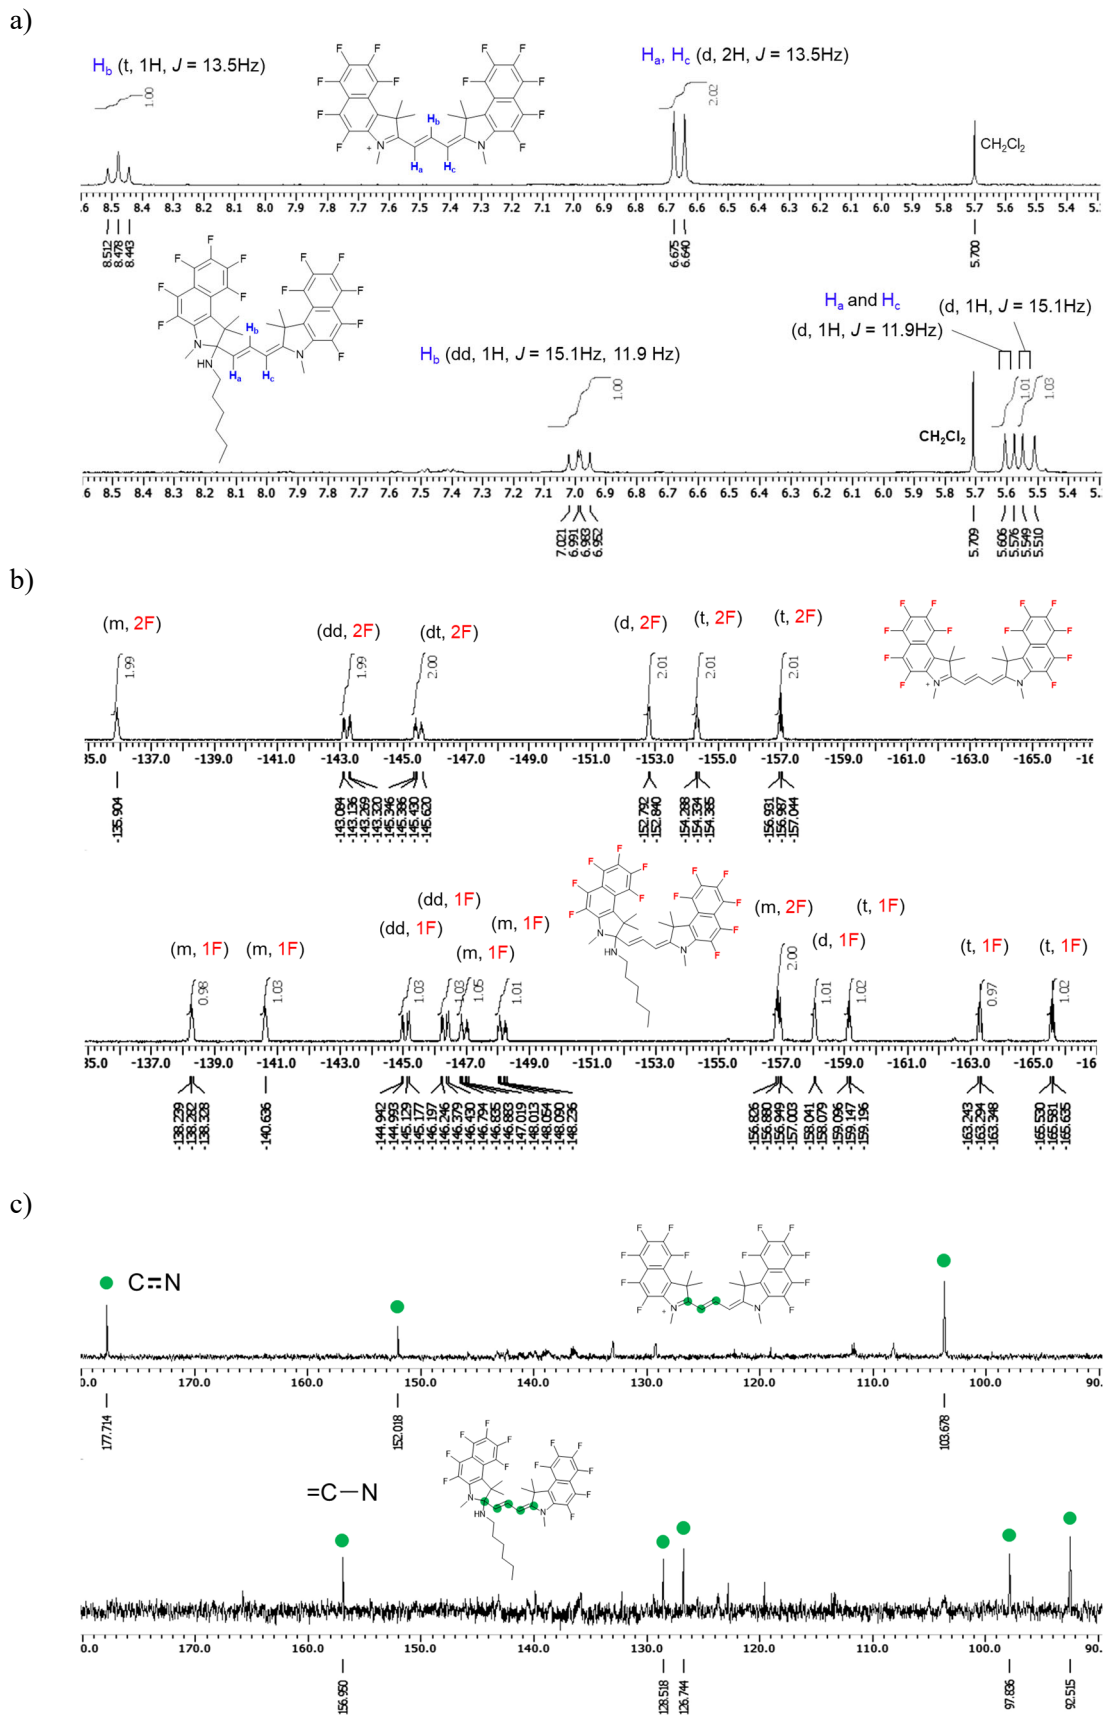

**Fig. S3.** a)  $^1\text{H}$ , b)  $^{19}\text{F}$ , and c)  $^{13}\text{C}$  NMR analysis for the reaction of dye **2a** ( $1 \times 10^{-5}$  mol) with *n*-hexylamine (20 equiv) in  $\text{DMSO}-d_6$ .

a)

### Elemental Composition Report

#### Single Mass Analysis

Tolerance = 50.0 mDa / DBE: min = -1.5, max = 100.0  
 Element prediction: Off  
 Number of isotope peaks used for i-FIT = 3

Monoisotopic Mass, Even Electron Ions  
 1 formula(e) evaluated with 1 results within limits (all results (up to 1000) for each mass)  
 Elements Used:  
 C: 33-39 H: 21-36 N: 2-3 F: 11-12  
 20210716\_2 18 (0.637)  
 1: TOF MS ES+

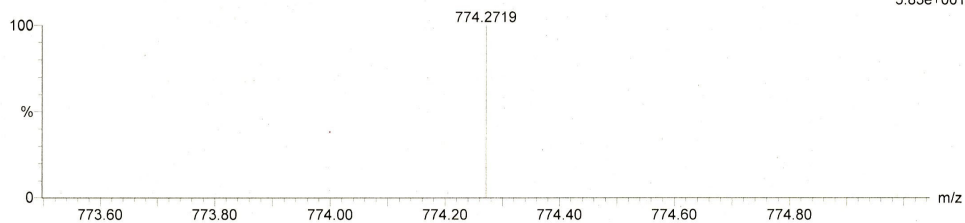

Minimum: -1.5  
 Maximum: 50.0 5.0 100.0

| Mass     | Calc. Mass | mDa | PPM | DBE  | i-FIT | i-FIT (Norm) | Formula        |
|----------|------------|-----|-----|------|-------|--------------|----------------|
| 774.2719 | 774.2718   | 0.1 | 0.1 | 17.5 | 17.7  | 0.0          | C39 H36 N3 F12 |

Page 1

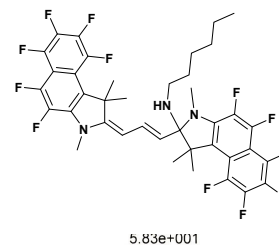

b)

### Elemental Composition Report

#### Single Mass Analysis

Tolerance = 5.0 mDa / DBE: min = -1.5, max = 50.0  
 Element prediction: Off  
 Number of isotope peaks used for i-FIT = 3

Monoisotopic Mass, Even Electron Ions  
 1 formula(e) evaluated with 1 results within limits (up to 50 closest results for each mass)  
 Elements Used:  
 C: 39-39 H: 48-48 N: 3-3 Na: 0-1  
 20220214\_2 22 (0.774)  
 1: TOF MS ES+

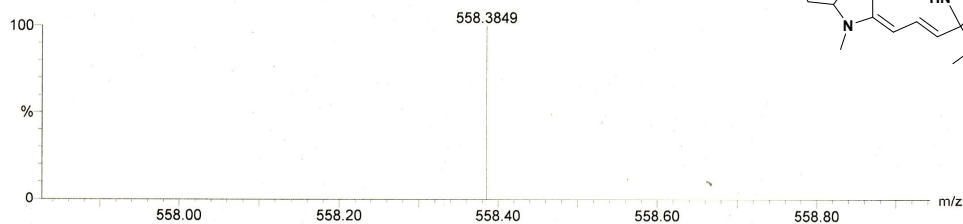

Minimum: -1.5  
 Maximum: 5.0 10.0 50.0

| Mass     | Calc. Mass | mDa | PPM | DBE  | i-FIT | i-FIT (Norm) | Formula    |
|----------|------------|-----|-----|------|-------|--------------|------------|
| 558.3849 | 558.3848   | 0.1 | 0.2 | 17.5 | 23.7  | 0.0          | C39 H48 N3 |

Page 1

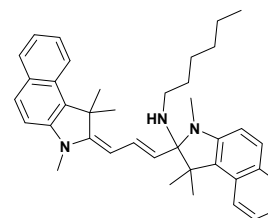

Fig. S4. a) MS analysis for amine-added dyes **2a** and b) **2b**.

## The results of fluorescence lifetime

### 1. Dye 2a ( $5 \times 10^{-6}$ M) in THF.

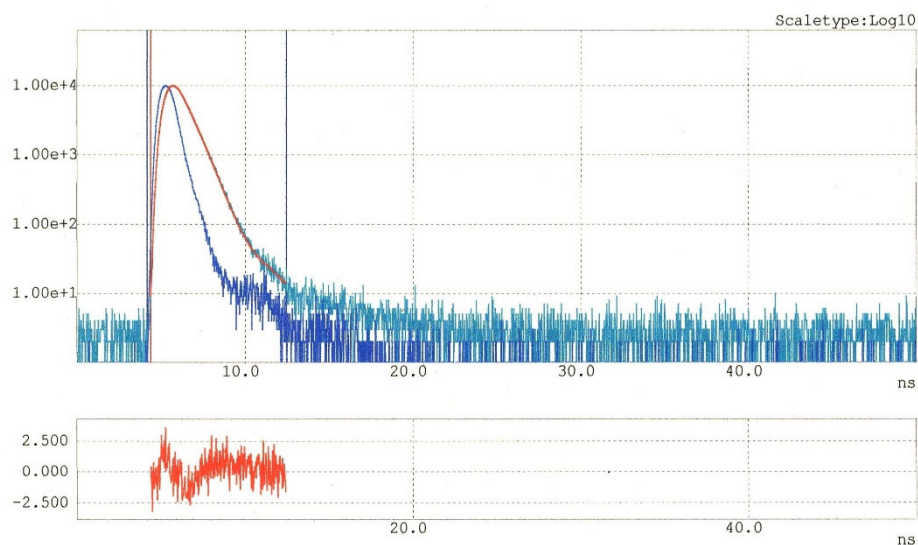

Excitation Wavelength /nm : 470  
 Time Range /ns : 50 ns  
 Stop Condition : Peak Count 10000  
 Frequency : 5 MHz

| Name | EMW | CH1   | Max. Time | <P>      | Tau1     | Tau2 | Tau3 | Tau4 | Tau5 | A1      | A2 | A3 | A4 | A5 | Background |
|------|-----|-------|-----------|----------|----------|------|------|------|------|---------|----|----|----|----|------------|
| 1    | 550 | 1.322 | 775.1     | 0.877118 | 0.877118 |      |      |      |      | 550.343 |    |    |    |    | 3          |

### 2. Dye 2a ( $5 \times 10^{-6}$ M) in THF with *n*-hexylamine (2 equiv).

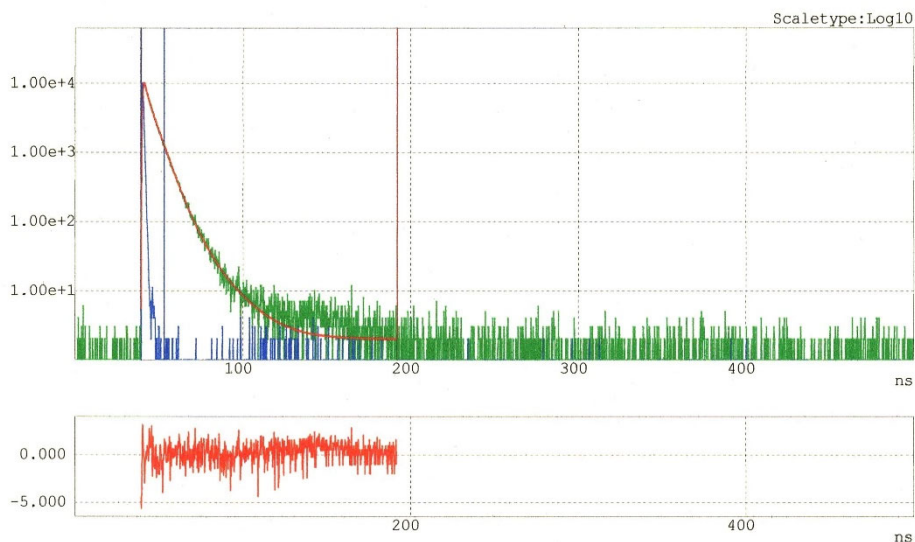

Excitation Wavelength /nm : 280  
 Time Range /ns : 500 ns  
 Stop Condition : Peak Count 10000  
 Frequency : 500 kHz

| Name | EMW | CH1    | Max. Time | <P>     | Tau1     | Tau2    | Tau3    | Tau4 | Tau5 | A1      | A2     | A3      | A4 | A5 | Background |
|------|-----|--------|-----------|---------|----------|---------|---------|------|------|---------|--------|---------|----|----|------------|
| 0    | 400 | 1.3809 | 318.8     | 0.68041 | 0.920043 | 5.93555 | 14.6132 |      |      | 1424.64 | 2113.5 | 65.9387 |    |    | 2          |

3. Dye **2b** ( $5 \times 10^{-6}$  M) in THF.

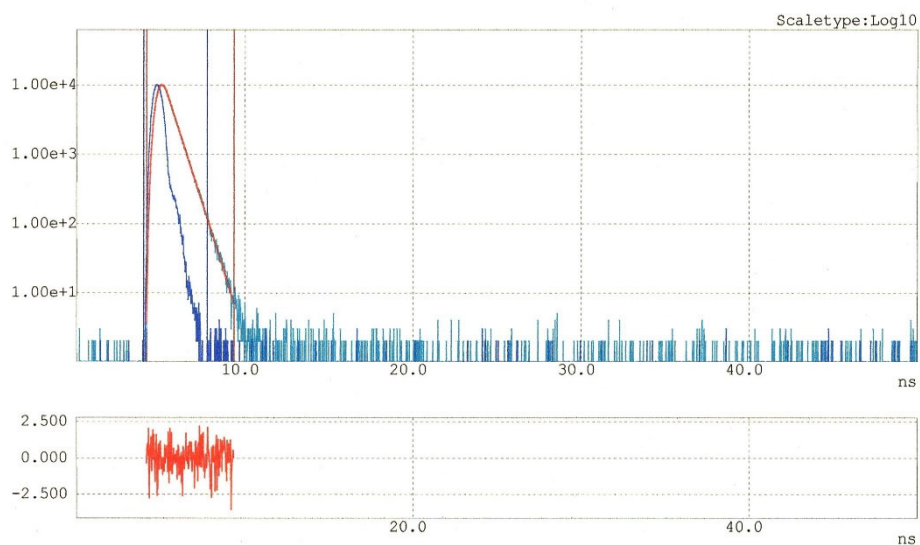

Excitation Wavelength /nm : 590  
 Time Range /ns : 50 ns  
 Stop Condition : Peak Count 10000  
 Frequency : 5 MHz

| Name | FWHM | CHI     | Max. Time | <σ>      | Tau1     | Tau2     | Tau3 | Tau4 | Tau5 | A1      | A2      | A3 | A4 | A5 | Background |
|------|------|---------|-----------|----------|----------|----------|------|------|------|---------|---------|----|----|----|------------|
| 1    | 812  | 1.01673 | 178.1     | 0.521394 | 6.568674 | 0.569989 |      |      |      | 372.584 | 447.812 |    |    |    | -1         |

4. Dye **2b** ( $5 \times 10^{-6}$  M) in THF with *n*-hexylamine (6400 equiv).

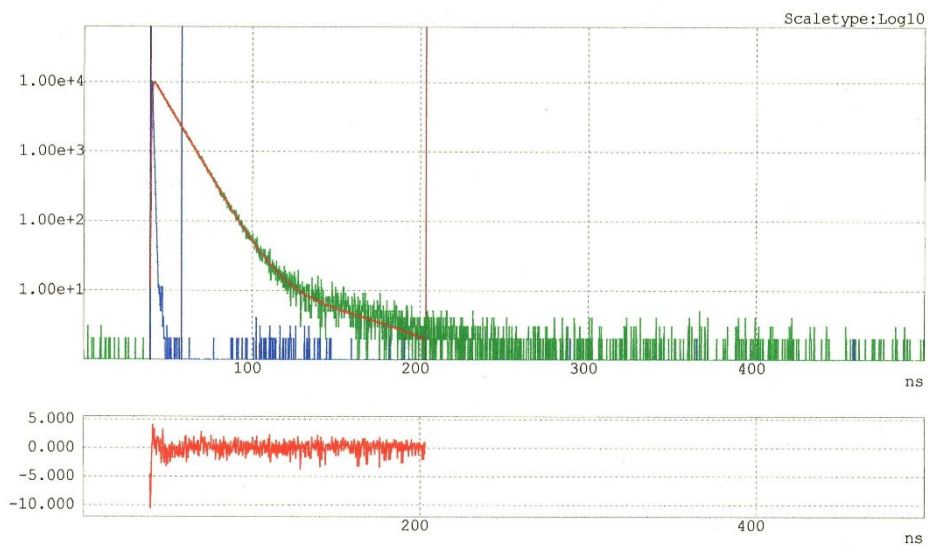

Excitation Wavelength /nm : 280  
 Time Range /ns : 500 ns  
 Stop Condition : Peak Count 10000  
 Frequency : 500 kHz

| Name | FWHM | CHI     | Max. Time | <σ>     | Tau1    | Tau2    | Tau3 | Tau4 | Tau5 | A1      | A2      | A3 | A4 | A5 | Background |
|------|------|---------|-----------|---------|---------|---------|------|------|------|---------|---------|----|----|----|------------|
| 0    | 386  | 1.48219 | 142.1     | 12.5432 | 10.6124 | 116.829 |      |      |      | 2924.16 | 6.00465 |    |    |    | -3         |

## Computational Details.

All calculations were performed using the computational chemistry software package Gaussian 16 ver. C.01<sup>1</sup>. Computational resources in the form of super computers were provided by Research Center for Computational Science, Okazaki, Japan.

Ground state geometries of compound **2a**, **2b** were calculated by DFT at the RB3LYP/6-31+G(d,p) scrf=(solvent=dichloromethane) level.

At the optimized structures, no imaginary frequency was found through the frequency analysis. All coordinates are reported as XYZ Cartesian coordinates. And computed E (RB3LYP) and sum of electronic and thermal Energies of optimized structures are shown.



**2a**

E (RB3LYP) = -2577.625224 a.u.

Sum of electronic and thermal Energies= -2577.105643 a.u.

Imaginary Frequency = 0

**Table S2.** Cartesian coordinates of the optimized **2a**.

| Atom | Coordinates (Angstroms) |           |           |
|------|-------------------------|-----------|-----------|
|      | X                       | Y         | Z         |
| C    | -4.774293               | 1.679121  | 0.113635  |
| C    | -4.470385               | 0.326227  | 0.028708  |
| C    | -7.129699               | 1.214178  | 0.096221  |
| C    | -6.109535               | 2.128579  | 0.145227  |
| C    | -7.717549               | -2.467815 | -0.114018 |
| C    | -6.39228                | -2.934096 | -0.14786  |
| C    | -7.955656               | -1.119263 | -0.03362  |
| C    | -5.517185               | -0.64266  | -0.019877 |
| C    | -6.892559               | -0.180418 | 0.015315  |
| C    | -5.340403               | -2.052482 | -0.102301 |
| N    | -3.603706               | 2.453804  | 0.147685  |
| F    | -4.107832               | -2.601618 | -0.138989 |
| F    | -6.169158               | -4.253266 | -0.224546 |
| F    | -8.72643                | -3.347827 | -0.159563 |
| F    | -9.23736                | -0.713067 | -0.001876 |
| F    | -8.385876               | 1.691996  | 0.124729  |
| F    | -6.43154                | 3.436279  | 0.215262  |
| C    | -2.940127               | 0.194919  | -0.002834 |
| C    | -2.449846               | -0.41239  | -1.345305 |
| H    | -2.818832               | 0.177788  | -2.188852 |
| H    | -1.35994                | -0.421335 | -1.391677 |
| H    | -2.799661               | -1.436685 | -1.458139 |
| C    | -2.407165               | -0.556135 | 1.248391  |
| H    | -2.739138               | -0.057855 | 2.1634    |
| H    | -2.765246               | -1.58366  | 1.263404  |
| H    | -1.316505               | -0.581564 | 1.254173  |
| C    | -2.503949               | 1.663284  | 0.069525  |
| C    | -1.220919               | 2.214996  | 0.049669  |
| H    | -1.156294               | 3.297585  | 0.070494  |
| C    | -3.538674               | 3.917438  | 0.256423  |
| H    | -3.104668               | 4.337972  | -0.654453 |

|   |           |           |           |
|---|-----------|-----------|-----------|
| H | -4.534484 | 4.319885  | 0.394101  |
| H | -2.923325 | 4.189931  | 1.116578  |
| C | 4.774294  | 1.679122  | -0.113637 |
| C | 4.470386  | 0.326228  | -0.02871  |
| C | 7.1297    | 1.214178  | -0.096234 |
| C | 6.109536  | 2.12858   | -0.145234 |
| C | 7.717546  | -2.467817 | 0.114009  |
| C | 6.392276  | -2.934095 | 0.147862  |
| C | 7.955655  | -1.119265 | 0.033605  |
| C | 5.517186  | -0.642658 | 0.019873  |
| C | 6.89256   | -0.180418 | -0.015327 |
| C | 5.3404    | -2.052479 | 0.102305  |
| N | 3.603706  | 2.453803  | -0.147679 |
| F | 4.107828  | -2.601609 | 0.139009  |
| F | 6.169152  | -4.253264 | 0.224556  |
| F | 8.726425  | -3.34783  | 0.159551  |
| F | 9.237361  | -0.713072 | 0.001853  |
| F | 8.385877  | 1.691996  | -0.124746 |
| F | 6.431541  | 3.436279  | -0.215266 |
| C | 2.94013   | 0.194917  | 0.002839  |
| C | 2.449864  | -0.412407 | 1.345308  |
| H | 2.818846  | 0.17777   | 2.188858  |
| H | 1.359958  | -0.421368 | 1.391686  |
| H | 2.799693  | -1.436699 | 1.458133  |
| C | 2.407165  | -0.556131 | -1.248388 |
| H | 2.739126  | -0.057842 | -2.163395 |
| H | 2.765255  | -1.583654 | -1.263411 |
| H | 1.316505  | -0.58157  | -1.254161 |
| C | 2.50395   | 1.663282  | -0.069508 |
| C | 3.538672  | 3.917437  | -0.256418 |
| H | 3.104717  | 4.337977  | 0.65448   |
| H | 4.534475  | 4.319881  | -0.394155 |
| H | 2.923276  | 4.189928  | -1.11654  |
| C | 0         | 1.533904  | 0.000011  |
| H | -0.000001 | 0.452585  | 0.000002  |
| C | 1.220919  | 2.214995  | -0.049639 |
| H | 1.156296  | 3.297585  | -0.07045  |

**2b**

E (RB3LYP) = -1386.857547 a.u.

Sum of electronic and thermal Energies= -1386.250611 a.u.

Imaginary Frequency = 0

**Table S3.** Cartesian coordinates of the optimized **2b**.

| Atom | Coordinates (Angstroms) |           |           |
|------|-------------------------|-----------|-----------|
|      | X                       | Y         | Z         |
| C    | 4.789846                | 1.298894  | -0.072853 |
| C    | 4.451362                | -0.041172 | -0.009714 |
| C    | 7.124263                | 0.81666   | -0.063018 |
| C    | 6.122905                | 1.761442  | -0.099119 |
| C    | 7.627154                | -2.881807 | 0.096161  |
| C    | 6.284639                | -3.333637 | 0.124224  |
| C    | 7.892986                | -1.531113 | 0.034932  |
| C    | 5.471224                | -1.031601 | 0.027173  |
| C    | 6.839779                | -0.576295 | -0.001204 |
| C    | 5.237192                | -2.437193 | 0.091056  |
| N    | 3.615191                | 2.084655  | -0.101136 |
| C    | 2.929019                | -0.162516 | 0.010734  |
| C    | 2.437767                | -0.809493 | 1.331719  |
| H    | 2.797733                | -0.245401 | 2.196623  |
| H    | 1.34751                 | -0.843293 | 1.376574  |
| H    | 2.808566                | -1.832679 | 1.416098  |
| C    | 2.411509                | -0.9215   | -1.239199 |
| H    | 2.743836                | -0.428653 | -2.156985 |
| H    | 2.79223                 | -1.944532 | -1.247403 |
| H    | 1.32099                 | -0.971085 | -1.253474 |
| C    | 2.503744                | 1.314039  | -0.046215 |
| C    | 1.224542                | 1.879063  | -0.034018 |
| H    | 1.170765                | 2.963316  | -0.048685 |
| C    | 3.602645                | 3.543591  | -0.173531 |
| H    | 3.182193                | 3.967429  | 0.742964  |
| H    | 4.618345                | 3.910238  | -0.29548  |
| H    | 3.01029                 | 3.871391  | -1.031537 |
| C    | -4.789838               | 1.298902  | 0.072879  |
| C    | -4.451363               | -0.041162 | 0.009658  |
| C    | -7.124255               | 0.816655  | 0.063607  |
| C    | -6.122893               | 1.761443  | 0.099469  |

|   |           |           |           |
|---|-----------|-----------|-----------|
| C | -7.627165 | -2.881814 | -0.095435 |
| C | -6.284654 | -3.333638 | -0.123818 |
| C | -7.892989 | -1.531121 | -0.03415  |
| C | -5.471229 | -1.031596 | -0.026977 |
| C | -6.839779 | -0.576298 | 0.001728  |
| C | -5.237204 | -2.437188 | -0.090908 |
| N | -3.61518  | 2.084666  | 0.100939  |
| C | -2.929025 | -0.162497 | -0.011216 |
| C | -2.43814  | -0.809315 | -1.332416 |
| H | -2.798328 | -0.245107 | -2.197151 |
| H | -1.347898 | -0.843134 | -1.377571 |
| H | -2.808979 | -1.832484 | -1.416827 |
| C | -2.411153 | -0.921625 | 1.238478  |
| H | -2.743197 | -0.428875 | 2.156418  |
| H | -2.791887 | -1.944653 | 1.24668   |
| H | -1.320626 | -0.971222 | 1.252414  |
| C | -2.503742 | 1.314054  | 0.045805  |
| C | -3.602624 | 3.543599  | 0.17342   |
| H | -3.182386 | 3.967495  | -0.743147 |
| H | -4.618296 | 3.910234  | 0.295627  |
| H | -3.010071 | 3.871347  | 1.031307  |
| C | -0.000001 | 1.204482  | -0.000246 |
| H | -0.000008 | 0.122533  | -0.000235 |
| C | -1.224538 | 1.879072  | 0.033561  |
| H | -1.170752 | 2.963324  | 0.048294  |
| H | -6.366361 | 2.816072  | 0.143152  |
| H | -8.162635 | 1.134134  | 0.081268  |
| H | -8.918752 | -1.172839 | -0.012154 |
| H | -8.440561 | -3.600269 | -0.122147 |
| H | -6.077392 | -4.398532 | -0.172135 |
| H | -4.223698 | -2.817248 | -0.114365 |
| H | 4.223683  | -2.817258 | 0.114276  |
| H | 6.077371  | -4.398532 | 0.172499  |
| H | 8.440547  | -3.600258 | 0.123074  |
| H | 8.918752  | -1.172825 | 0.013182  |
| H | 8.162646  | 1.134143  | -0.080425 |
| H | 6.366378  | 2.816073  | -0.142729 |

## Reference

<sup>1</sup> Gaussian 16, Revision C.01, M. J. Frisch, G. W. Trucks, H. B. Schlegel, G. E. Scuseria, M. A. Robb, J. R. Cheeseman, G. Scalmani, V. Barone, G. A. Petersson, H. Nakatsuji, X. Li, M. Caricato, A. V. Marenich, J. Bloino, B. G. Janesko, R. Gomperts, B. Mennucci, H. P. Hratchian, J. V. Ortiz, A. F. Izmaylov, J. L. Sonnenberg, D. Williams-Young, F. Ding, F. Lipparini, F. Egidi, J. Goings, B. Peng, A. Petrone, T. Henderson, D. Ranasinghe, V. G. Zakrzewski, J. Gao, N. Rega, G. Zheng, W. Liang, M. Hada, M. Ehara, K. Toyota, R. Fukuda, J. Hasegawa, M. Ishida, T. Nakajima, Y. Honda, O. Kitao, H. Nakai, T. Vreven, K. Throssell, J. A. Montgomery, Jr., J. E. Peralta, F. Ogliaro, M. J. Bearpark, J. J. Heyd, E. N. Brothers, K. N. Kudin, V. N. Staroverov, T. A. Keith, R. Kobayashi, J. Normand, K. Raghavachari, A. P. Rendell, J. C. Burant, S. S. Iyengar, J. Tomasi, M. Cossi, J. M. Millam, M. Klene, C. Adamo, R. Cammi, J. W. Ochterski, R. L. Martin, K. Morokuma, O. Farkas, J. B. Foresman, and D. J. Fox, Gaussian, Inc., Wallingford CT, 2019.
